# Supplementary material
Source: publisher site journal article supplement (https://www.dovepress.com/article/485431)
Supplement: Supplementary file 1 [file get_supplementary_file.php]

**Supplementary Material**

Table S1 Strength centrality and predictability of the PHQ and DAS items.

| Item | Predictability |
| --- | --- |
| DAS1 (Fear of death) | 0.775 |
| DAS2 (Rarely think of death) | 0.849 |
| DAS3 (Don’t get nervous talking about death) | 0.879 |
| DAS4 (Fear of surgery) | 0.906 |
| DAS5 (No fear of death at all) | 0.742 |
| DAS6 (No fear of cancer) | 0.879 |
| DAS7 (Not troubled by the thought of death) | 0.743 |
| DAS8 (Agonizing over how fast time flies) | 0.858 |
| DAS9 (Fear of a painful death) | 0.883 |
| DAS10 (The topic of post death is very confusing to me) | 0.778 |
| DAS11 (Fear of heart attack) | 0.852 |
| DAS12(Life is too short) | 0.863 |
| DAS13 (Hear about the end of the world scares me) | 0.863 |
| DAS14 (Feel creepy seeing a dead body) | 0.885 |
| DAS15 (Nothing to fear about the future) | 0.821 |
| PHQ1 (Anhedonia) | 0.642 |
| PHQ2 (Sad mood) | 0.612 |
| PHQ3 (Sleep problem) | 0.750 |
| PHQ4 (Fatigue) | 0.645 |
| PHQ5 (Poor appetite/overeating) | 0.722 |
| PHQ6 (Guilt feelings) | 0.657 |
| PHQ7 (Problems with concentration) | 0.741 |
| PHQ8 (Moving/speaking slowly or being fidget) | 0.708 |
| PHQ9 (Suicide ideation) | 0.706 |

Note: DAS = Death anxiety scale, PHQ = Patient health questionnaire.


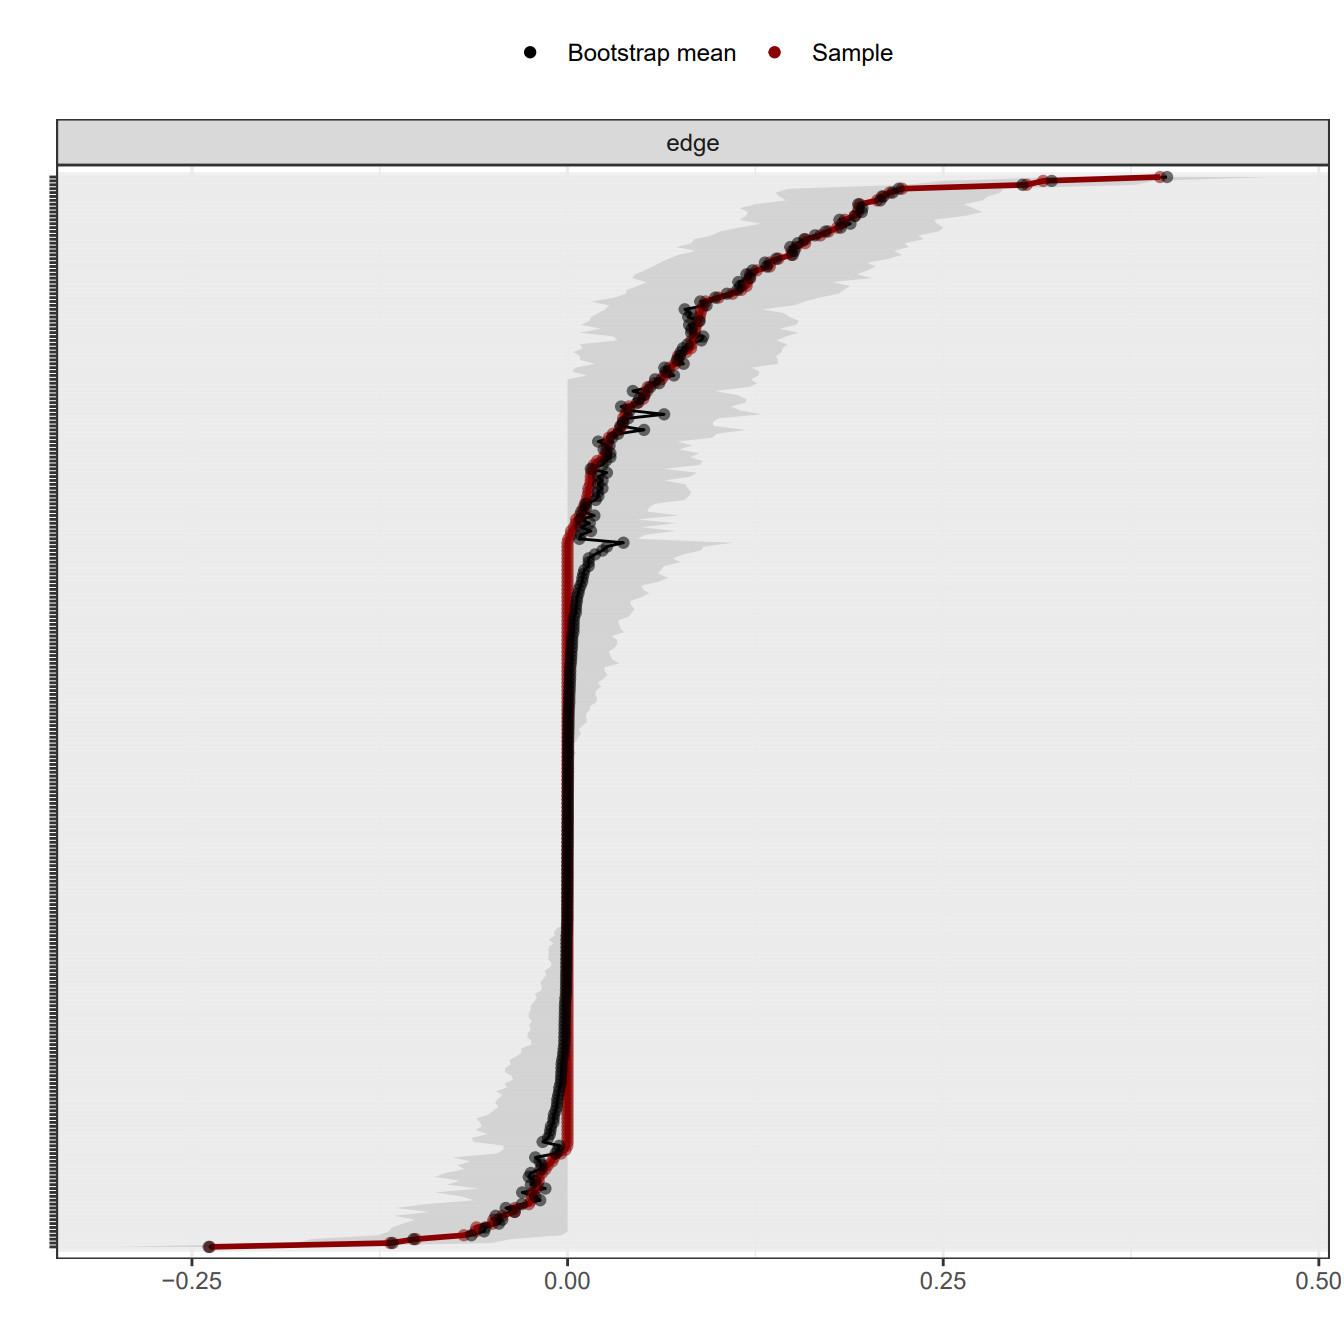
**Figure S1.** Bootstrapped 95% CIs of estimated edge weights. Note: The red line represents the edge generated by the sample. The grey indicates 95% bootstrapped confidence interval.


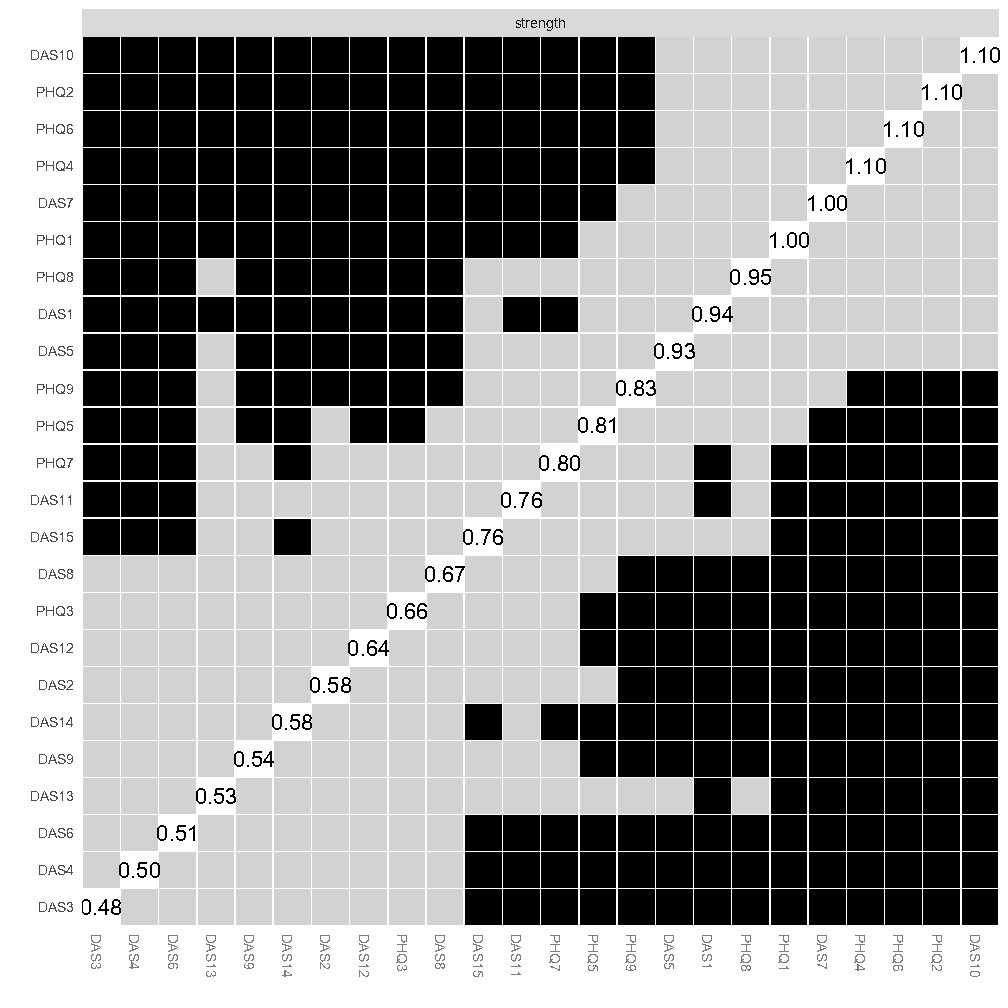


**Figure S2.** Nonparametric bootstrapped difference test for node strength of the death anxiety and depression network.
